1 **Title:** A new method for obtaining bankable and expandable adult-like microglial  
2 cells

3

4 **Author:** Min-Jung You<sup>1</sup>, Chan Rim<sup>1</sup>, Youn-Jung Kang<sup>2</sup>, and Min-Soo Kwon<sup>1,\*</sup>

5

6 **Affiliations**

7 1) Department of Pharmacology, Research Institute for Basic Medical Science,  
8 School of Medicine, CHA University, CHA BIO COMPLEX, 335 Pangyo, Bundang-  
9 gu, Seongnam-si, Gyeonggi-do, 13488, Republic of Korea.

10 2) Department of Biochemistry, Research Institute for Basic Medical Science, School  
11 of Medicine, CHA University, CHA BIO COMPLEX, 335 Pangyo, Bundang-gu,  
12 Seongnam-si, Gyeonggi-do, 13488, Republic of Korea.

13

14 **\*\*Correspondence to:**

15 Min-Soo Kwon, M.D., Ph. D.

16 Professor

17 Department of Pharmacology, Research Institute for Basic Medical Science, School  
18 of Medicine, CHA University, CHA BIO COMPLEX, 335 Pangyo, Bundang-gu,  
19 Seongnam-si, Gyeonggi-do, 13488, Republic of Korea

20

21 Tel: +82-31-881-7106; Fax: +82-31-881-7114;

22 E-mail: [minsoo100@cha.ac.kr](mailto:minsoo100@cha.ac.kr)

23

24

25

26

27

28

29

30

31

32

33 **Abstract**

34

35 The emerging role of microglia in neurological disorders requires a novel method for  
36 obtaining massive amounts of adult microglia because current *in vitro* methods for  
37 microglial study have many limitations, including a limited proliferative capacity, low  
38 cell yield, immature form, and too many experimental animals use. Here, we  
39 developed a new method for obtaining bankable and expandable adult-like microglial  
40 cells using the head neuroepithelial layer (NEL) of mouse E13.5. The NEL includes  
41 microglia progenitors that proliferate and ramify over time. Functional validation with  
42 a magnetic-activated cell sorting system using the NEL showed that the isolated  
43 CD11b-positive cells (NEL-MG) exhibited microglial functions, such as phagocytosis  
44 (microbeads, amyloid  $\beta$ , synaptosome), migration, and inflammatory changes  
45 following lipopolysaccharide (LPS) stimulation. NEL was subcultured and the NEL-  
46 MG exhibited a higher expression of microglia signature genes than the neonatal  
47 microglia, a widely used *in vitro* surrogate. Banking or long-term subculture of NEL  
48 did not affect NEL-MG characteristics. Transcriptome analysis revealed that NEL-  
49 MG exhibited better conservation of microglia signature genes with a closer fidelity  
50 to freshly isolated adult microglia than neonatal microglia. This new method  
51 effectively contributes to obtaining adult-like microglial cells, even when only a small  
52 number of experimental animals are available, leading to a broad application in  
53 neuroscience-associated fields.

54

55 **Keywords: Microglia; Neuroepithelial layer; subculture; banking**

56

57

58

59

60

61

62

63

64

65

66

## 67 **Introduction**

68

69 Since their discovery in the 20th century by Rio-Hortega, microglia were considered  
70 professional phagocytes, similar to macrophages for a long time. However, recent  
71 studies propose microglia as a promising target beyond phagocytes under  
72 neuroinflammatory/neurodegenerative conditions (Nayak, Roth, & McGavern, 2014).  
73 Microglia are capable of morphological remodeling without any indication of insult or  
74 neurodegeneration (Nimmerjahn, Kirchhoff, & Helmchen, 2005), suggesting a broad  
75 functional repertoire, including the maintenance of biochemical homeostasis,  
76 neuronal circuit maturation during development, and experience-dependent  
77 remodeling of neuronal circuits in the adult brain (Lenz & Nelson, 2018). The  
78 dynamic microglial function lasts during our entire lifetime, and its disturbance can  
79 induce abnormal neurodevelopment and neurodegeneration (Matcovitch-Natan et al.,  
80 2016).

81 Despite the increase in knowledge regarding microglial biology (Prinz, Jung, &  
82 Priller, 2019), lack of a well-validated *in vitro* culture method remains a bottleneck  
83 for establishing a therapeutic strategy targeting microglia. The current *in vitro* culture  
84 of microglia still requires a microglial cell line and primary culture using neonatal  
85 cortex or the adult brain. Microglial cell lines, such as BV2, N9, SIM-A9, Mocha, and  
86 MHC3, have an advantage in proliferation and subculture; however, they differ from  
87 adult microglia in genetic and functional aspects due to immortalization (Timmerman,  
88 Burm, & Bajramovic, 2018). Neonatal microglia have not been artificially  
89 manipulated, but have disadvantages regarding their proliferative capacity, and  
90 subculture and banking abilities. Both the microglial cell line and neonatal microglia  
91 rarely express key adult microglia genes; in particular, TMEM119 immunoreactivity  
92 (IR) is missed (Bennett et al., 2016; Butovsky et al., 2014) because microglial cells  
93 develop according to a stepwise program (Matcovitch-Natan et al., 2016). Acute  
94 isolation of adult microglia is challenging due to their restricted proliferative capacity,  
95 cell viability, and requirement of a greater number of animals (Butovsky et al., 2012;  
96 Timmerman et al., 2018). The iPSC-derived microglia-like cells might also be an  
97 alternative method; however, this method is expensive, time-consuming, and not  
98 easily accessible (Muffat et al., 2016). In addition, iPSC-derived microglia-like cells  
99 do not originate in the yolk sac and do not show adequate TMEM119 IR compared to  
100 adult microglia (Abud et al., 2017). Thus, while the demand for microglia for use in

101 research is increasing, there are no current *in vitro* methodologies that overcome the  
102 above-mentioned limitations.

103 Mouse microglia progenitors begin to migrate from the yolk sac into the CNS at  
104 E8.5 and surround the neuroepithelial layer (NEL) in the part corresponding to the  
105 head (Hoeffel et al., 2015; Nayak et al., 2014). Subsequently, microglia progenitors  
106 move into the CNS parenchyma until approximately E18.5 and are matured in the  
107 CNS microenvironment (Gosselin et al., 2017). As the CNS matures, microglia  
108 acquire a ramified morphology, surveying the surrounding parenchyma via movement  
109 of dynamic processes (Nimmerjahn et al., 2005).

110 In the support of the idea that microglia progenitor derived from yolk sac should  
111 pass NEL to enter CNS parenchyma, we could obtain and co-culture microglial  
112 progenitors and neuroepithelial cells together by dissecting mouse E13.5 head NEL,  
113 expecting that neuroepithelial cells play a role as feeder cells. By this new  
114 methodology, we could establish *in vitro* approach to obtain bankable and expandable  
115 adult-like microglial cells.

116

## 117 **Results**

118 *Expandable and ramified microglial cells are generated from mouse E13.5 head*  
119 *neuroepithelial layer*

120 To determine the optimal period for obtaining a high yield of microglia progenitors  
121 in the head NEL, we dissected head NEL from mouse E9.5, E13.5, and E17.5 and  
122 cultured them (Fig. 1A). Immunofluorescence analyses revealed that the highest  
123 numbers of microglia progenitors were obtained from the mouse E13.5 NEL  
124 compared to that of mouse E9.5 or E17.5 (Fig. S1). The flow cytometry results  
125 showed that E13.5 NEL contain more CD11b-positive cells than the brain cortex at  
126 E13.5 (Fig. S1). We next examined whether microglia progenitors were expandable  
127 and ramified over time in this culture system. The proportion of CD11b-positive cells  
128 increased from 14.2% up to 54.0% after 21 days of culture (Fig. 1B). The  
129 immunofluorescence results showed that the number of microglial cells that were  
130 IBA-1-, PU1-, and F4/80-positive increased over time. The percentage of double  
131 positive cells (Ki67 and IBA-1) also increased to 50%, suggesting that microglia have  
132 a high proliferative capacity in this culture system (Fig. 1C).

133

134 *Functional validation of magnetically isolated CD11b positive cells (NEL-MG)*

135 CD11b-positive cells were isolated using a magnetic-activated cell sorting (MACS)  
136 system from the E13.5 NEL (NEL-MG). NEL-MG stained positive for microglia  
137 markers with IBA-1 and CX3CR1. NEL-MG showed a relatively weak TMEM119  
138 IR; however, they did not express Ki67 (Fig. 2A). Next, we conducted microglia-  
139 specific functional assays, including phagocytosis, migration, and  
140 cytokine/chemokine release using NEL-MG. NEL-MG showed phagocytic function  
141 against stimuli, such as synaptosome, amyloid  $\beta$ , and microbeads (Fig. 2B). The  
142 scratch wound assay results showed that NEL-MG could migrate (Fig. 2C). Based on  
143 the cytokine and chemokine profiles, unstimulated NEL-MG released detectable  
144 cytokines and chemokines, including the C-X-C motif chemokine ligand 10  
145 (CXCL10), CXCL1, C-C motif chemokine ligand 12 (CCL12), CCL3, TNF- $\alpha$ , and  
146 IL-6. The addition of endotoxin (LPS) triggered the release of chemokines and  
147 cytokines above baseline levels (untreated) (Fig. 2D), which was verified at the  
148 transcriptional level, with an increase in the mRNA expression of iNOS, TNF- $\alpha$ , IL-  
149 1 $\beta$ , IL-6, and CCL3 (Fig. 2E). Therefore, NEL-MG acted as a substrate for studying  
150 the functional changes in microglia to screen for inflammatory modulators.

#### 151 *Long-term passage culture of NEL and a higher expression of NEL-MG on microglia signature* 152 *genes*

153 After validating the microglial function of NEL-MG, we hypothesized whether the  
154 long-term passage culture of E13.5 NEL was possible. Whenever the cells reached  
155 stratification, the cells in one 25T flask were subcultured into two 25T flasks and  
156 cultured for approximately 10 days. As we undertook this passage culture, we  
157 obtained approximately double the microglial cells until at least passages 6–7 (first  
158 obtained microglial cell number  $\times 2^n$ ,  $n$  = passage number). This was because we  
159 could obtain about 50% of CD11b-positive cells from NEL, despite the long-term  
160 passage culture (Figs. 3A and S2). However, the required time for the next passage  
161 gradually increased as the subculture progressed and subculture without obtaining  
162 twice as many cells only occurred after passage 7. Therefore, the total number of  
163 microglia obtained when we used a cutoff of 100 days was 30 times higher than using  
164 the neonatal microglia method (Fig. S2).

165 We next examined the alterations in the microglial signature genes in NEL-MG  
166 obtained from long-term cultured NEL to determine the optimal period for obtaining  
167 adult-like microglia. NEL-MG were isolated from 21, 30, 40, 50, 60, 100, 120, and

168 180 days of NEL culturing, and the expression of microglial signature genes in each  
169 NEL-MG group was compared to that in neonatal microglia. The expression of most  
170 of the microglia identity genes was stably maintained and was higher than in neonatal  
171 microglia up to 180 days; however, the expression levels of *Tgfb1*, *Mafb*, *Trem2*, and  
172 *Csf1r* were significantly lower at 120 days than at 21 days (Fig. 3B). The expression  
173 level of the representative adult microglia gene, *Tmem119*, gradually increased until  
174 isolation from the 50-day cultured NEL and decreased afterward; however, it  
175 remained approximately 3-fold higher than *Tmem119* expression in neonatal  
176 microglia. Our data strongly suggest that adult microglia-like NEL-MG were  
177 obtainable from cultured NEL for 21–100 days (P0–P7). However, the IR of  
178 microglial markers, such as IBA-1, CX3CR1, and TMEM119, and their phagocytic  
179 function did not change, regardless of the NEL culture duration (Fig. 3C and D).

180

181 *Banked NEL-MG stably maintain the expression of overall microglia signature genes*

182 Animals must be sacrificed to obtain primary microglia; therefore, whether NEL is  
183 bankable needs to be determined. NELs ( $1 \times 10^7$  cells/mL) were banked for  
184 approximately ten months in media composed of Dulbecco's modified Eagle medium  
185 (DMEM) with 20% fetal bovine serum (FBS) and 10% DMSO (banked NEL, bNEL).  
186 As shown in Figure 4A, after thawing, the bNEL proliferated well, similar to fresh  
187 NEL. To investigate whether the banking timing affected NEL-MG characteristics,  
188 NELs were banked at different passages (P1, P2, P3, and P4) and were cultured for 70  
189 days after thawing. Each NEL-MG group isolated from bNEL at different time points  
190 (7, 14, 21, 40, and 70 days) showed a stable expression of microglia signature genes.  
191 The expression levels of these genes remained higher than those in neonatal microglia  
192 (Fig. 4B); however, *TMEM119* mRNA expression showed a decreasing trend at 70  
193 days (not significant). *Csf1r* expression was also reduced after thawing; however, its  
194 mRNA level was gradually restored as the culture progressed. NEL-MG isolated from  
195 bNEL did not show alterations in the phagocytic function compared to NEL-MG  
196 isolated from fresh NEL (Figs. 3D and 4C).

197

198 *Transcriptome analysis revealed that NEL-MG are closer to adult microglia than*  
199 *neonatal microglia*

200 To more thoroughly characterize NEL-MG compared to the BV2 cell line, neonatal  
201 microglia, and adult microglia, we conducted transcriptome analysis. Using 3D  
202 principal component analysis (PCA) of the whole transcriptome, each group was  
203 classified into distinct clusters based on their identity. NEL-MG and bNEL-MG were  
204 clustered together and were distinct from the BV2 cell line and neonatal microglia.  
205 The component explaining the majority of the dataset variance was PC1, which most  
206 prominently distinguished neonatal microglia and NEL-MG from adult microglia and  
207 occupied an edge position along PC1. The second principal component (PC2)  
208 uniquely distinguished the BV2 cell line from neonatal microglia and adult microglia.  
209 The third principal component (PC3) uniquely distinguished NEL-MG from neonatal  
210 microglia (Fig. 5A). The PCA Euclidean distances to the adult microglia were  
211 calculated between all pairs of points in each group, using PC1, PC2, and PC3 on the  
212 microglia signature genes (Table S1) (Butovsky et al., 2014; Najafi et al., 2018).  
213 NEL-MG and bNEL-MG were significantly closer to adult microglia than BV2 and  
214 neonatal microglia (Fig. 5B). The hierarchy analysis of the microglia signature genes  
215 showed that NEL-MG and bNEL-MG formed a cluster and had more similarities to  
216 adult microglia than to BV2 cell line and neonatal microglia (Fig. 5C). The overall  
217 expression changes (z-score normalized) in microglia signature genes were compared  
218 among the BV2 cell line, neonatal microglia, NEL-MG, and adult microglia (mean  $\pm$   
219 standard deviation [SD]). Both NEL-MG and adult microglia were localized in the  
220 opposite area (positive Z-score) from neonatal microglia and the BV2 cell line  
221 (negative Z-score). The overall expression of microglia signature genes in the NEL-  
222 MG was elevated to the same expression level as that of the genes in adult microglia  
223 (Fig. 5D). In a normalized gene expression plot, the scatters in NEL-MG were more  
224 overlapped and closer to the diagonal line than neonatal microglia (Fig. S3).

225 We next performed differential gene expression analysis (DEG, absolute fold  
226 changes  $> 1.5$ ,  $p < 0.05$ ) and identified that NEL-MG shared 789 genes (up DEG: 302,  
227 down DEG: 487) with adult microglia (Fig. 5E). Gene ontology (GO) analysis  
228 revealed the gene subsets of the immune system process, actin filament organization,  
229 intracellular signaling transduction, and innate immune response (Fig. 5F). The  
230 KEGG pathway of the shared genes indicated Fc gamma R-mediated phagocytosis,  
231 leukocyte transendothelial migration, and chemokine signaling pathway (Fig. 5G).  
232 NEL-MG showed 2782 DEG (2,057 upregulated and 725 downregulated) compared  
233 to neonatal microglia (Fig. 5H), and the GO analysis revealed gene subsets, including

234 those involved in endocytosis, cell adhesion, cell migration, cholesterol biosynthetic  
235 process, cholesterol metabolic process, and the negative regulation of cell  
236 proliferation (Fig. 5I). To better understand the differential expression level of  
237 microglia signature genes between NEL-MG and neonatal microglia, we compared  
238 the fold change of the expression of microglia signature genes (Table S1), and 18  
239 genes were significantly changed (Fig. 5J).

240

#### 241 *Comparison of NEL-MG with adult microglia regarding microglia signature genes*

242 To further confirm the transcriptome analysis, we compared the mRNA expression of  
243 microglial signature genes among the BV2 cell line, SIM-A9 cell line, neonatal  
244 microglia, NEL-MG (50 days), and acutely isolated adult microglia. qRT-PCR  
245 analyses demonstrated that NEL-MG had higher or similar expression levels of  
246 microglia signature genes, including *Tgfb1*, *Tgfb1*, *Trem2*, *Csf1r*, *C1qa*, *Prosl*, and  
247 *Gas6* (Fig. 6A). Although *Tmem119* and *P2ry12* expression levels of NEL-MG did  
248 not reach those in adult microglia, they were higher than in neonatal microglia. In  
249 addition, the intensity of TMEM119 IR in NEL-MG (50 days) was similar to that in  
250 adult microglia, whereas BV2 and neonatal microglia did not show TMEM119 IR  
251 (Fig. 6B).

252

#### 253 *Cultured NEL-MG showed lower re-expansion on neuroepithelial cells*

254 To further explore whether cultured NEL-MG could be proliferative again on  
255 neuroepithelial cells as a feeder, we isolated and cultured GFP-expressing NEL-MG  
256 derived from NEL of GFP mice (GFP-expressing NEL-MG). Then, GFP-expressing  
257 NEL-MG were cultured on the remaining neuroepithelial cells (from B6 mice) after  
258 NEL-MG isolation. As shown in Figure 7A and B, using flow cytometry, we  
259 confirmed that the relative ratio of GFP-expressing NEL-MG did not increase  
260 significantly over time, although GFP<sup>+</sup>Ki67<sup>+</sup> cells were examined in the  
261 immunofluorescence study. Therefore, NEL-MG had a lower proliferative capacity,  
262 even when they were plated again on neuroepithelial cells.

263

264

265

266

267



## 268 **Discussion**

269 Our robust protocol allowed us to obtain bankable and expandable microglial cells,  
270 leading to the production of a high yield of microglial cells that were closer to adult  
271 microglia than neonatal microglia based on PCA. We based our study on the  
272 developmental process, in which mouse microglial cells were derived from yolk sac  
273 macrophage precursors and colonized into nascent parenchyma via the head  
274 neuroepithelial layer between E8.5 and E18.5 (Nayak et al., 2014). The  
275 neuroepithelial layer in this area includes mainly two types of cells: neuroepithelial  
276 cells and microglia progenitors. Thus, we obtained microglial cells by dissecting and  
277 culturing the neuroepithelial layer cells with lower cell heterogeneity than the brain  
278 cortex, which is composed of neurons, microglia, astrocytes, and oligodendrocytes,  
279 making it possible to obtain purer microglial cells. Neuroepithelial cells were  
280 assumed to act as feeders for microglia proliferation and maturation, which was  
281 evidenced by our data, showing that microglia progenitors proliferate with Ki67-  
282 positive labeling on neuroepithelial cells, although NEL-MG alone failed to  
283 proliferate. Therefore, neuroepithelial cells within a co-culture system play a critical  
284 role as feeders for microglial proliferation and maturation. This result also indicates  
285 that the matured form of NEL-MG does not have the same proliferative capacity as  
286 microglia progenitors, despite the neuroepithelial support. Similarly, an astrocyte  
287 feeder layer or an astrocyte-conditioned medium makes microglia morphology and  
288 other properties resemble adult microglia more closely (Bohlen et al., 2017; Tanaka &  
289 Maeda, 1996). Compared to the astrocyte feeder method, our proposed protocol has  
290 advantages in a simpler methodology making banking and subculture possible.

291 Microglia rely on sustained CSF-1 stimuli, which is a well-established trophic cue  
292 for survival (Elmore et al., 2014), and TGF- $\beta$  family members promote microglial  
293 survival and development (Butovsky et al., 2014). Along with CSF-1 and TGF- $\beta$ ,  
294 cholesterol is another main factor that permits the robust survival of highly ramified  
295 adult microglia (Bohlen et al., 2017). Our GO results indicate that NEL-MG shared  
296 pathways in general microglia function with adult microglia compared to neonatal  
297 microglia. However, NEL-MG was distinct from neonatal microglia, especially  
298 regarding the cholesterol biosynthetic process and metabolic process. Given the link  
299 between an inadequate delivery of cholesterol and generalized microglial dysfunction,  
300 the cholesterol metabolic system might be involved in key features in a more matured

301 form of NEL-MG than neonatal microglia. The expression of microglial signature  
302 genes, including *TMEM119*, *P2RY12*, and *CX3CR1*, is gradually reduced with age or  
303 in neurodegenerative diseases, suggesting the loss of homeostatic microglial function  
304 (Deczkowska, Amit, & Schwartz, 2018). *De novo* synthesized cholesterol transported  
305 via APOE- or APOJ-containing nano-discs within the CNS (Pfrieger & Ungerer,  
306 2011; Rapp, Gmeiner, & Huttinger, 2006) contribute to amyloid  $\beta$  clearance and  
307 microglial cholesterol content (Lee, Tse, Smith, & Landreth, 2012). Increased lipid  
308 metabolism is required to fuel protective cellular functions, such as phagocytosis  
309 (Loving & Bruce, 2020). Thus, we speculate that alterations in the cholesterol  
310 metabolic system might be associated with the characteristics of the matured form of  
311 NEL-MG, which is closer to adult microglia.

312 There are several aspects that require further exploration regarding NEL-MG. First,  
313 the cultured NEL-MG had a lower proliferative capacity despite the re-support of  
314 neuroepithelial cells. Microglial cells are dedifferentiated when they lose their cell-  
315 cell interactions. Acutely isolated adult microglial cells rapidly lost their identity in  
316 culture media, suggesting microglial dedifferentiation (Bohlen et al., 2017). NEL-MG  
317 might also be dedifferentiated when they are separate from neuroepithelial cells,  
318 which might be associated with a reduced proliferative capacity. Second, the  
319 supportive capacity of neuroepithelial cells as a feeder gradually decreased as the  
320 passage culture of NEL progressed, leading to a decrease in the microglial  
321 proliferative capacity. Third, the expression of *hexosaminidase subunit beta (Hexb)*,  
322 which is a microglial core gene stably expressed despite the pathological status  
323 (Masuda et al., 2020), and *colony stimulating factor receptor 1 (Csf1r)* was reduced in  
324 bNEL-MG compared to pre-banked NEL-MG and there was no difference in *Hexb*  
325 expression between NEL-MG and neonatal microglia. To overcome these limitations,  
326 further studies are required to develop an advanced methodology to produce improved  
327 NEL-MG with defined factors, which can induce sustained proliferation, maturation,  
328 subculture, and banking, instead of using neuroepithelial cell feeder.

329 Regarding the applications of our method, we propose the following as a platform  
330 for future use in the neuroscience field: 1) mass production of microglial cells for  
331 high-throughput drug screening, and 2) rapid and efficient generation of mutant  
332 microglial cells. Compared to neonatal microglia culture, our proposed method  
333 enabled us to obtain approximately 30 times more microglial cells when we used a

334 cutoff of 100 culture days. Drug screening for inflammatory modulators targeting  
335 neuroinflammation requires significant amounts of microglial cells; however, the  
336 currently used *in vitro* method for primary microglia can barely meet the requirements  
337 due to limited cell yields and the number of animals required. Thus, our method  
338 contributes to overcoming the main limitation of the currently used technique. In  
339 addition, the introduction of a newly reported mutant gene into the NEL allowed the  
340 production of mass mutant NEL-MG. Using this methodology, we can rapidly  
341 evaluate the functional characteristics of mutant microglia without using a mutant  
342 generation. Given that the *in vivo* brain exhibits complex cell–cell interactions  
343 supported by contact-dependent signaling from the surrounding cells, mutant NEL-  
344 MG might be mixed with a brain organoid to further observe their behavior in a 3D  
345 brain environment, based on the fact that NEL-MG is mixed evenly with  
346 neurospheroids (Fig. S4) (Abud et al., 2017). In addition, NEL-MG might contribute  
347 to the development of a brain organoid with a controllable microglia ratio because the  
348 currently used brain organoid does not contain microglial cells, although one study  
349 has reported that a brain organoid might innately contain microglial cells (Ormel et al.,  
350 2018). Overall, our proposed method contributes to 3D brain culture and conventional  
351 2D primary microglial culture.

352 In conclusion, we expect that our methodology contribute to overcoming the  
353 limitations of previous *in vitro* culture methods for microglia study by leveraging the  
354 NEL-MG platform, and increasing the adult-like microglial cell yield. Above all, we  
355 believe that our new methodology will reduce dramatically the use of experimental  
356 animals and increase the accessibility of microglial research.

357  
358  
359  
360  
361  
362  
363  
364  
365  
366  
367

368 **Material and methods**

369

370 **Mouse embryonic neuroepithelial layer dissection and culture**

371 Uteri from pregnant mice (female C57BL/6, Orient Bio Inc. Seoul, Korea or female  
372 B6-EGFP mice, Jackson lab) were dissected and soaked in Hanks' Balanced Salt  
373 Solution (HBSS, Invitrogen, USA). The umbilical cord and yolk sac in the  
374 mesometrial surface of the uterus were removed using microsurgical instruments  
375 under a microscope and the embryo was taken out of the uterus. Then, the NEL was  
376 dissected carefully using a pair of microsurgical scissors. The shredded tissue was  
377 incubated with 1 mL of 1X Trypsin-EDTA (ThermoFisher, USA) for 3 min at 37 °C  
378 in a water bath. After centrifuging at  $300 \times g$  for 5 min, the cells were plated onto 25  
379  $\text{cm}^2$  flasks coated with poly-D-lysine (Sigma, MO, USA). The cells were cultured in  
380 DMEM-LG containing 10% FBS, 1X penicillin:streptomycin and 0.1% GlutaMAX at  
381 37 °C in a 5%  $\text{CO}_2$  incubator. The culture medium was replaced with 5 mL of fresh  
382 growth medium after 24 h. Subsequently, half the culture medium volume was  
383 replaced with an equal volume of fresh growth medium twice per week.

384

385 **Isolation of microglial cells from NEL**

386 On ~day 21, when stratification was reached, NEL culture flasks were incubated with  
387 1X trypsin-EDTA for 1 min, resulting in the detachment of an intact layer of cells in  
388 one piece. The pellet was resuspended in cold MACS buffer (containing a 1-volume  
389 dilution of PBS, 2 mM EDTA, and 0.5% BSA, pH 7.2), and myelin removal beads  
390 (Myelin Removal Beads II, 130-96-733, Miltenyi Biotec) were used according to the  
391 manufacturer's protocol to prepare the cells for incubation with microbead-coupled  
392 anti-CD11b mAb. Briefly, cells were incubated with the beads at 4 °C for 15 min, and  
393 then the cells were washed onto the MS column on a magnetic separator. The column  
394 was washed thrice with PBS buffer, and the NEL-MG were obtained via positive  
395 selection. NEL-MG were resuspended in microglial complete culture medium  
396 (DMEM, 10% FBS, 0.1% GlutaMAX, 5  $\mu\text{g}/\text{mL}$  insulin, and 1%  
397 penicillin/streptomycin), transferred to PDL-coated plates at a density of  $2.5 \times 10^5$   
398 cells/mL, and cultured for subsequent molecular studies.

399

400

#### 401 **Adult microglial cell isolation**

402 Adult microglial cells were isolated from 8-10 week old mice (male C57BL/6,  
403 Orient Bio Inc. Seoul, Korea). Enzymatic cell dissociation was performed using an  
404 Adult Brain Dissociation Kit (130-107-677, Miltenyi Biotec) according to the  
405 manufacturer's instructions. Brain tissue pieces (up to 500 mg) were transferred into a  
406 gentleMACS C tube (130-096-334, Miltenyi Biotec) containing 1,950  $\mu$ L of enzyme  
407 mix 1 (enzyme P and buffer Z), and then 30  $\mu$ L of enzyme mix 2 (enzyme A and  
408 buffer Y) was added. The gentleMACS C tube was tightly closed and attached upside  
409 down onto the sleeve of the gentleMACS Octo Dissociator with Heaters (130-096-  
410 427, Miltenyi Biotec), and the appropriate gentleMACS program (37C\_ABDK\_01)  
411 was run. After brief centrifugation to collect the samples at the bottom of the tube, the  
412 samples were filtered through a 70- $\mu$ m strainer (130-098-462, Miltenyi Biotec),  
413 washed with D-PBS, and centrifuged again. The pellet was resuspended in cold D-  
414 PBS. The myelin and cell debris were removed using debris removal solution,  
415 followed by subsequent removal of erythrocytes using a red blood cell removal  
416 solution. Pure adult microglial cells were magnetically isolated using microbeads-  
417 coupled anti-CD11b mAb, as stated previously.

418

#### 419 **Neonatal microglia culture**

420 Postnatal 1–2-day-old B6 mice (Orient Bio Inc. Seoul, Korea) were sacrificed and  
421 soaked in 75% ethanol for 1 min. The cerebral hemispheres were dissected following  
422 standard techniques and anatomical landmarks, and the meninges were peeled off.  
423 The hippocampus, basal ganglion, and olfactory bulb were carefully removed using  
424 microsurgical instruments under a microscope, and the remaining cortical tissue was  
425 minced using a pair of microsurgical scissors. The shredded tissue was then incubated  
426 with 3 mL of HBSS (Invitrogen) for 5 min at 37 °C in a water bath. After centrifuging  
427 at 300  $\times$  g for 5 min, the cells were plated onto 75 cm<sup>2</sup> flasks coated with poly-L-  
428 lysine (Sigma). Mixed glial cells were cultured in DMEM-LG containing 10% FBS  
429 and 0.1% GlutaMAX at 37 °C and 5% CO<sub>2</sub> in an incubator. The culture medium was  
430 replaced with 15 mL of fresh growth medium after 24 h. Subsequently, half of the  
431 culture medium volume was replaced with an equal volume of fresh growth medium  
432 twice a week. Stratification was reached at the end of this period, and the microglial  
433 cells in the upper layer were harvested. On day 14, flasks were incubated with 1X  
434 trypsin-EDTA for 1 min, resulting in the detachment of an intact layer of cells in one

435 piece. The pellet was resuspended in cold MACS buffer (containing 1-volume  
436 dilution of PBS, 2 mM EDTA, and 0.5% BSA, pH 7.2), and then myelin removal  
437 beads (Myelin Removal Beads II, 130-96-733, Miltenyi Biotec) were used according  
438 to the manufacturer's protocol to prepare the cells for incubation with microbeads-  
439 coupled anti CD11b mAb. Briefly, the cells were incubated with the beads at 4 °C for  
440 15 min, and then the cells were washed onto the MS column on the magnetic  
441 separator. The column was washed thrice with PBS buffer, and the magnetically  
442 labeled cells were obtained via positive selection. The cells were resuspended in  
443 microglial complete culture medium (DMEM, 10% FBS, 0.1% GlutaMAX, 5 µg/mL  
444 insulin, and 1% penicillin/streptomycin) and transferred to PDL-coated plates at a  
445 density of  $2.5 \times 10^5$  cells/mL for molecular studies.

446

#### 447 **BV2 cell line and SIM-A9 culture**

448 Murine BV-2 microglial cells were maintained in DMEM supplemented with 10%  
449 FBS and antibiotics at 37° C in a 5% CO<sub>2</sub> incubator. Then, the cells were seeded onto  
450 6-well plates at a density of  $2 \times 10^5$  cells/well for quantitative polymerase chain  
451 reaction (qPCR) analysis and RNAseq. SIM-A9 is a microglial cell line that was  
452 purchased from Kerfast (Boston, USA). These cells, referred to as SIM-A9 cells and  
453 related to native primary microglial cells, have been characterized for morphology  
454 and the release of cytokines/chemokines. After receiving, the cells were passaged in  
455 an uncoated 100 mm cell culture dish in DMEM/F-12 (Gibco, cat. # 11320-033)  
456 containing 10% heat-inactivated FBS (Gibco, cat. # 16000-044), 5% heat-inactivated  
457 horse serum (Invitrogen cat. # 16050-122), and 1% penicillin/streptomycin (Gibco,  
458 cat. # 15140122). Cells were cultured at 37 °C in an incubator with 5% CO<sub>2</sub>.

459

#### 460 **Flow cytometry**

461 The cells were collected and labeled using fluorochrome-conjugated monoclonal  
462 antibodies recognizing antigens (CD11b-PE, BD Biosciences #553311) at 4 °C for 15  
463 min. After labeling, the cells were washed twice in PBS and resuspended in a final  
464 volume of 400 µL. Flow cytometry was performed using a CytoFLEX (Beckman  
465 Coulter, cytoflex B4-R1-Vo) and the data were analyzed using CytExpert software.

466

467 **Quantitative polymerase chain reaction (qPCR)**

468 Total RNA was extracted using TRIzol reagent (Invitrogen), and evaluated using a  
469 NanoDrop 2000 spectrophotometer (Thermo Scientific, ND-2000). cDNA was  
470 synthesized using RevertAid First Strand cDNA Synthesis Kit (Thermo, MA, USA).  
471 To assess the microglia signature in NEL-MG, we analyzed the expression of  
472 *Tmem119* (Qiagen, Germany, PPM28876A), *P2ry12* (PPM04913C), *Mertk*  
473 (PPM34425A), *Tgfb1* (PPM02991B), *Mafb* (PPM05266A), *Gpr34* (PPM04860A),  
474 *Pros1* (PPM31106A), *Clqa* (PPM24525E), *Gas6* (PPM05523A), *Csflr*  
475 (PPM03625F), *Hexb* (PPM27125A), and *Gapdh* (PPM02946E) genes. Other primer  
476 information (*Trem2*, *iNOS*, *TNF- $\alpha$* , *IL-1 $\beta$* , *IL-6*, and *CCL3*) is indicated in Table S2.

477

478 **Immunocytochemistry**

479 Microglial cells were seeded on glass cover slips in 24-well plates. Cells were washed  
480 with PBS and cultured; the cultured cells were then fixed in 4% formaldehyde and  
481 permeabilized with 0.1% Triton X-100 for 5–10 min. Indirect immunofluorescence  
482 was performed using the following primary antibodies: rabbit anti-PU1 (1:200,  
483 Abcam, MA, USA; Ab88082), mouse anti-Ki67 (1:500, BD Pharmingen; 550609),  
484 mouse anti-F4/10 (1:200, Abcam; Ab6640), rabbit anti-CX3CR1 antibody (1:200,  
485 Abcam), rabbit anti-TMEM119 antibody (1:200, Abcam), rabbit anti-IBA-1 antibody  
486 (1:500, Wako, MA, USA), and goat anti-IBA1 antibody (1:500, Abcam; Ab48004).  
487 Cells were incubated with the primary antibodies diluted in 0.5% Triton X-100 in  
488 PBS containing 5% normal donkey serum at 4 °C overnight. After rinsing thrice with  
489 PBS for 5 min, Alexa 488- or Alexa-594-conjugated secondary antibodies (Abcam)  
490 were used for detection. Nuclei were counterstained with 4'-diamidino-2-  
491 phenylindole (DAPI; Sigma). Cells without the addition of primary antibodies served  
492 as negative controls. Fluorescent images were taken using a confocal microscope  
493 (LSM 700, Carl Zeiss, Jena, Germany).

494

495 **Purification and labeling of synaptosome**

496 One hemisphere (male C57BL/6, Orient Bio Inc. Seoul, Korea), excluding the  
497 cerebellum, (~ 200 – 400 mg), was homogenized in 10 volumes of Syn-PER Synaptic

498 Protein Extraction Reagent (Thermo Fisher Scientific, Part No. 87785) using a 7 mL  
499 Dounce tissue grinder with 10 up-and-down even strokes. The homogenate was  
500 centrifuged at  $1,200 \times g$  for 10 minutes to remove the cell debris, and the supernatant  
501 was centrifuged at  $15,000 \times g$  for 20 minutes to obtain the synaptosome pellet. The  
502 pellets were gently resuspended in the respective reagent. Synaptosomes were  
503 conjugated with an amine-reactive dye (pHrodo Red, SE; Thermo Scientific;  
504 #P36600) in 0.1 M sodium carbonate (pH 9.0) at room temperature. After 2 h of  
505 incubation, unbound pHrodo was washed-out via multiple rounds of centrifugation  
506 and pHrodo-conjugated synaptosomes were resuspended in isotonic buffer containing  
507 5% DMSO for subsequent freezing (Invitrogen, #P36600).

508

### 509 **Phagocytosis assay**

510 To assess the phagocytic activity, NEL-MG at a density of  $2 \times 10^5$  cells/mL were  
511 seeded on a 12-mm coverslip in 24-well cell culture dishes. NEL-MG were treated  
512 with 2  $\mu$ L of red fluorescent latex beads (2  $\mu$ m, Sigma-Aldrich, St. Louis, MO, USA),  
513 HiLyte<sup>TM</sup> Fluor 488-labeled amyloid  $\beta$  peptide 25-35 (2  $\mu$ L), or pHrodo-conjugated  
514 synaptosomes for 2 h at 37 °C. HiLyte<sup>TM</sup> Fluor 488-labeled amyloid  $\beta$  peptide 25-35  
515 (Anaspec, AS-633308) was prepared according to the manufacturer's protocol.  
516 Phagocytic activity was then stopped by adding 2 mL of ice-cold PBS. The cells were  
517 washed twice with ice-cold PBS, fixed, stained with a microglial marker (IBA-1), and  
518 counterstained with DAPI. The cells were analyzed using confocal microscopy (TCS  
519 SP5, Leica) and a DeltaVision fluorescence microscopy system (Applied Precision).

520

### 521 **Scratch wound assay**

522 NEL-MG were seeded onto 24-well plates in a 100% confluent monolayer until they  
523 were 95% confluent and were wounded by making a perpendicular scratch with a 200  
524  $\mu$ L pipette tip. The cells were replenished with fresh growth medium and wound  
525 closure was documented by photographing the same region at different times (0–6 h).  
526 The wound area was calculated as the open wound area/total area.

527

528



529 **Cytokine profiles**

530 The supernatant was analyzed using a Proteome Profiler Mouse Cytokine Array  
531 Panel A Kit (R&D Systems; catalog number ARY006) at the baseline and after LPS  
532 stimuli according to the manufacturer's indications. Images were captured using a  
533 LAS 4000 (ImageQuant™) and analyzed using ImageJ software program.

534

535 **RNA sequence and data analysis**

536 RNA quality was assessed with an Agilent 2100 bioanalyzer using an RNA 6000  
537 Nano Chip (Agilent Technologies, Amstelveen, Netherlands). The library construction  
538 was performed using a QuantSeq 3'-mRNA-Seq Library Prep Kit (Lexogen, Inc.,  
539 Austria) according to the manufacturer's instructions. High-throughput sequencing  
540 was performed as 75 single-end sequences using NextSeq 500 (Illumina, Inc., USA).  
541 QuantSeq 3'-mRNA-Seq reads were aligned using Bowtie2 (Langmead and Salzberg,  
542 2012). Differentially expressed genes were determined based on the counts from  
543 unique and multiple alignments using coverage in Bedtools (Quinlan AR, 2010). The  
544 Read Count data were processed based on the quantile normalization method using  
545 Edge R within R (R Development Core Team, 2016) using Bioconductor (Gentleman  
546 et al., 2004). Gene classification was based on searches done using DAVID  
547 (<http://david.abcc.ncifcrf.gov/>) and Medline databases (<http://www.ncbi.nlm.nih.gov/>).

548

549 **Neurospheroid culture**

550 The whole brain was dissected from postnatal 1–2-day-old mice (C57BL/6, Orient  
551 Bio Inc. Seoul, Korea). Brain tissues were then cut and chopped in HBSS (Gibco) for  
552 3 min. Next, the dissected brain was centrifuged at  $300 \times g$  for 5 min, after which the  
553 pellet was resuspended and washed twice in D-PBS. To detect the capacity for self-  
554 renewal,  $10^5$  cells were plated onto each well of a 25T-flask in growth-promoting  
555 medium: DMEM/F12 containing B27 supplement ( $\times 50$ ), minus vitamin A (12587010,  
556 ThermoFisher), 50 ng/mL FGF2 (100-18B, PEPROTECH), and 50 ng/mL EGF (AF-  
557 100-15, PEPROTECH). Cultures were maintained at 37 °C in a 5% CO<sub>2</sub> incubator for  
558 neurospheroid (NS) formation.

559

560

561 **CellTracker labeling**

562 NEL-MG were labeled using CellTrackerRed CMTPX (Invitrogen) before mixing  
563 with NS. Labelling was performed according to the manufacturer's indications.

564

565 **Mixing of NEL-MG with neurospheroids**

566 NEL-MG were co-mixed with dissociated NS or post-treated with the already formed  
567 NS. NS were mixed with NEL-MG in a 9:1 ratio ( $1.8 \times 10^6$  NS:  $2 \times 10^5$  NEL-MG) or  
568 a 7:3 ratio ( $1.4 \times 10^6$  NS:  $6 \times 10^5$  NEL-MG) in DMEM/F12 containing B27  
569 supplement ( $\times 50$ ), 50 ng/mL FGF2, and 50 ng/mL EGF. After the addition of NEL-  
570 MG, the plates were maintained under static conditions in a shaking incubator (70  
571 rpm) at 37 °C with 5% CO<sub>2</sub>.

572

573 **Statistical analysis**

574 The statistical significance of differences between groups was assessed using an  
575 unpaired t-test or one-way analysis of variance using GraphPad Prism version 7 for  
576 Mac (GraphPad, La Jolla, CA). A *post-hoc* test was performed using one-way analysis  
577 of variance when the p-values were significant ( $p < 0.05$ ).

578

579 **Declarations**

580 • **Ethics approval and consent to participate**

581 All experimental procedures were approved by the Institutional Animal Care and Use  
582 Committee (IACUC) of the CHA University (IACUC200116)

583 • **Consent for publication**

584 Not applicable

585 • **Availability of data and material**

586 All data generated and/or analyzed during the current study are available from the  
587 corresponding author on reasonable request.

588 • **Competing interests**

589 The authors declare that they have no competing interests

590 • **Funding**

591 • This research was supported by the National Research Foundation of Korea (NRF)  
592 grant funded by the Korea government (MIST) (2019M3C7A1032561), by Basic

593 Science Research Program (2020R1F1A1074668), by a grant of the Korea Health  
594 Technology R&D Project through the Korea Health Industry Development Institute  
595 (KHIDI), funded by the Ministry of Health & Welfare, Republic of Korea  
596 (HI16C1559).

597 • **Authors' contributions**

598 • You MJ conducted *in vitro* experiments and wrote the manuscript. Rim C analyzed  
599 transcriptome. Kang YJ interpreted all data and revised the manuscript. Kwon MS supervised  
600 all process, supported experimental conception and design, and approved final submission of  
601 manuscript. All authors critically revised the manuscript and confirmed author contribution  
602 statement.

603 • **Acknowledgements**

604 Not applicable

605  
606  
607  
608  
609  
610  
611  
612  
613  
614  
615  
616  
617  
618  
619  
620  
621  
622  
623  
624  
625  
626  
627  
628  
629  
630  
631  
632  
633  
634

635 **References**

636

637 Abud, E. M., Ramirez, R. N., Martinez, E. S., Healy, L. M., Nguyen, C. H. H.,  
638 Newman, S. A., Blurton-Jones, M. (2017). iPSC-Derived Human Microglia-  
639 like Cells to Study Neurological Diseases. *Neuron*, *94*(2), 278-293 e279.  
640 doi:10.1016/j.neuron.2017.03.042

641 Bennett, M. L., Bennett, F. C., Liddelow, S. A., Ajami, B., Zamanian, J. L., Fernhoff,  
642 N. B., Barres, B. A. (2016). New tools for studying microglia in the mouse  
643 and human CNS. *Proc Natl Acad Sci U S A*, *113*(12), E1738-1746.  
644 doi:10.1073/pnas.1525528113

645 Bohlen, C. J., Bennett, F. C., Tucker, A. F., Collins, H. Y., Mulinyawe, S. B., &  
646 Barres, B. A. (2017). Diverse Requirements for Microglial Survival,  
647 Specification, and Function Revealed by Defined-Medium Cultures. *Neuron*,  
648 *94*(4), 759-773 e758. doi:10.1016/j.neuron.2017.04.043

649 Butovsky, O., Jedrychowski, M. P., Moore, C. S., Cialic, R., Lanser, A. J., Gabriely,  
650 G., Weiner, H. L. (2014). Identification of a unique TGF-beta-dependent  
651 molecular and functional signature in microglia. *Nat Neurosci*, *17*(1), 131-143.  
652 doi:10.1038/nn.3599

653 Butovsky, O., Siddiqui, S., Gabriely, G., Lanser, A. J., Dake, B., Murugaiyan, G.,  
654 Weiner, H. L. (2012). Modulating inflammatory monocytes with a unique  
655 microRNA gene signature ameliorates murine ALS. *J Clin Invest*, *122*(9),  
656 3063-3087. doi:10.1172/JCI62636

657 Deczkowska, A., Amit, I., & Schwartz, M. (2018). Microglial immune checkpoint  
658 mechanisms. *Nat Neurosci*, *21*(6), 779-786. doi:10.1038/s41593-018-0145-x

659 Elmore, M. R., Najafi, A. R., Koike, M. A., Dagher, N. N., Spangenberg, E. E., Rice,  
660 R. A., Green, K. N. (2014). Colony-stimulating factor 1 receptor signaling is  
661 necessary for microglia viability, unmasking a microglia progenitor cell in the  
662 adult brain. *Neuron*, *82*(2), 380-397. doi:10.1016/j.neuron.2014.02.040

663 Gosselin, D., Skola, D., Coufal, N. G., Holtman, I. R., Schlachetzki, J. C. M., Sajti, E.,  
664 Glass, C. K. (2017). An environment-dependent transcriptional network  
665 specifies human microglia identity. *Science*, *356*(6344).  
666 doi:10.1126/science.aal3222

667 Hoeffel, G., Chen, J., Lavin, Y., Low, D., Almeida, F. F., See, P., Ginhoux, F. (2015).  
668 C-Myb(+) erythro-myeloid progenitor-derived fetal monocytes give rise to  
669 adult tissue-resident macrophages. *Immunity*, *42*(4), 665-678.  
670 doi:10.1016/j.immuni.2015.03.011

671 Lee, C. Y., Tse, W., Smith, J. D., & Landreth, G. E. (2012). Apolipoprotein E  
672 promotes beta-amyloid trafficking and degradation by modulating microglial  
673 cholesterol levels. *J Biol Chem*, *287*(3), 2032-2044.  
674 doi:10.1074/jbc.M111.295451

675 Lenz, K. M., & Nelson, L. H. (2018). Microglia and Beyond: Innate Immune Cells As  
676 Regulators of Brain Development and Behavioral Function. *Front Immunol*, *9*,  
677 698. doi:10.3389/fimmu.2018.00698

678 Loving, B. A., & Bruce, K. D. (2020). Lipid and Lipoprotein Metabolism in  
679 Microglia. *Front Physiol*, *11*, 393. doi:10.3389/fphys.2020.00393

680 Masuda, T., Amann, L., Sankowski, R., Staszewski, O., Lenz, M., P. D. E., Prinz, M.  
681 (2020). Novel Hexb-based tools for studying microglia in the CNS. *Nat*  
682 *Immunol*, *21*(7), 802-815. doi:10.1038/s41590-020-0707-4

683 Matcovitch-Natan, O., Winter, D. R., Giladi, A., Vargas Aguilar, S., Spinrad, A.,  
684 Sarrazin, S., Amit, I. (2016). Microglia development follows a stepwise

685 program to regulate brain homeostasis. *Science*, 353(6301), aad8670.  
686 doi:10.1126/science.aad8670  
687 Muffat, J., Li, Y., Yuan, B., Mitalipova, M., Omer, A., Corcoran, S., Jaenisch, R.  
688 (2016). Efficient derivation of microglia-like cells from human pluripotent  
689 stem cells. *Nat Med*, 22(11), 1358-1367. doi:10.1038/nm.4189  
690 Najafi, A. R., Crapser, J., Jiang, S., Ng, W., Mortazavi, A., West, B. L., & Green, K.  
691 N. (2018). A limited capacity for microglial repopulation in the adult brain.  
692 *Glia*, 66(11), 2385-2396. doi:10.1002/glia.23477  
693 Nayak, D., Roth, T. L., & McGavern, D. B. (2014). Microglia development and  
694 function. *Annu Rev Immunol*, 32, 367-402. doi:10.1146/annurev-immunol-  
695 032713-120240  
696 Nimmerjahn, A., Kirchhoff, F., & Helmchen, F. (2005). Resting microglial cells are  
697 highly dynamic surveillants of brain parenchyma in vivo. *Science*, 308(5726),  
698 1314-1318. doi:10.1126/science.1110647  
699 Ormel, P. R., Vieira de Sa, R., van Bodegraven, E. J., Karst, H., Harschnitz, O.,  
700 Sneuboer, M. A. M., Pasterkamp, R. J. (2018). Microglia innately develop  
701 within cerebral organoids. *Nat Commun*, 9(1), 4167. doi:10.1038/s41467-018-  
702 06684-2  
703 Pfrieder, F. W., & Ungerer, N. (2011). Cholesterol metabolism in neurons and  
704 astrocytes. *Prog Lipid Res*, 50(4), 357-371. doi:10.1016/j.plipres.2011.06.002  
705 Prinz, M., Jung, S., & Priller, J. (2019). Microglia Biology: One Century of Evolving  
706 Concepts. *Cell*, 179(2), 292-311. doi:10.1016/j.cell.2019.08.053  
707 Rapp, A., Gmeiner, B., & Huttinger, M. (2006). Implication of apoE isoforms in  
708 cholesterol metabolism by primary rat hippocampal neurons and astrocytes.  
709 *Biochimie*, 88(5), 473-483. doi:10.1016/j.biochi.2005.10.007  
710 Tanaka, J., & Maeda, N. (1996). Microglial ramification requires nondiffusible  
711 factors derived from astrocytes. *Exp Neurol*, 137(2), 367-375.  
712 doi:10.1006/exnr.1996.0038  
713 Timmerman, R., Burm, S. M., & Bajramovic, J. J. (2018). An Overview of in vitro  
714 Methods to Study Microglia. *Front Cell Neurosci*, 12, 242.  
715 doi:10.3389/fncel.2018.00242  
716  
717  
718  
719  
720  
721  
722  
723  
724  
725  
726  
727  
728

729 **Figures and Figure legends**

730

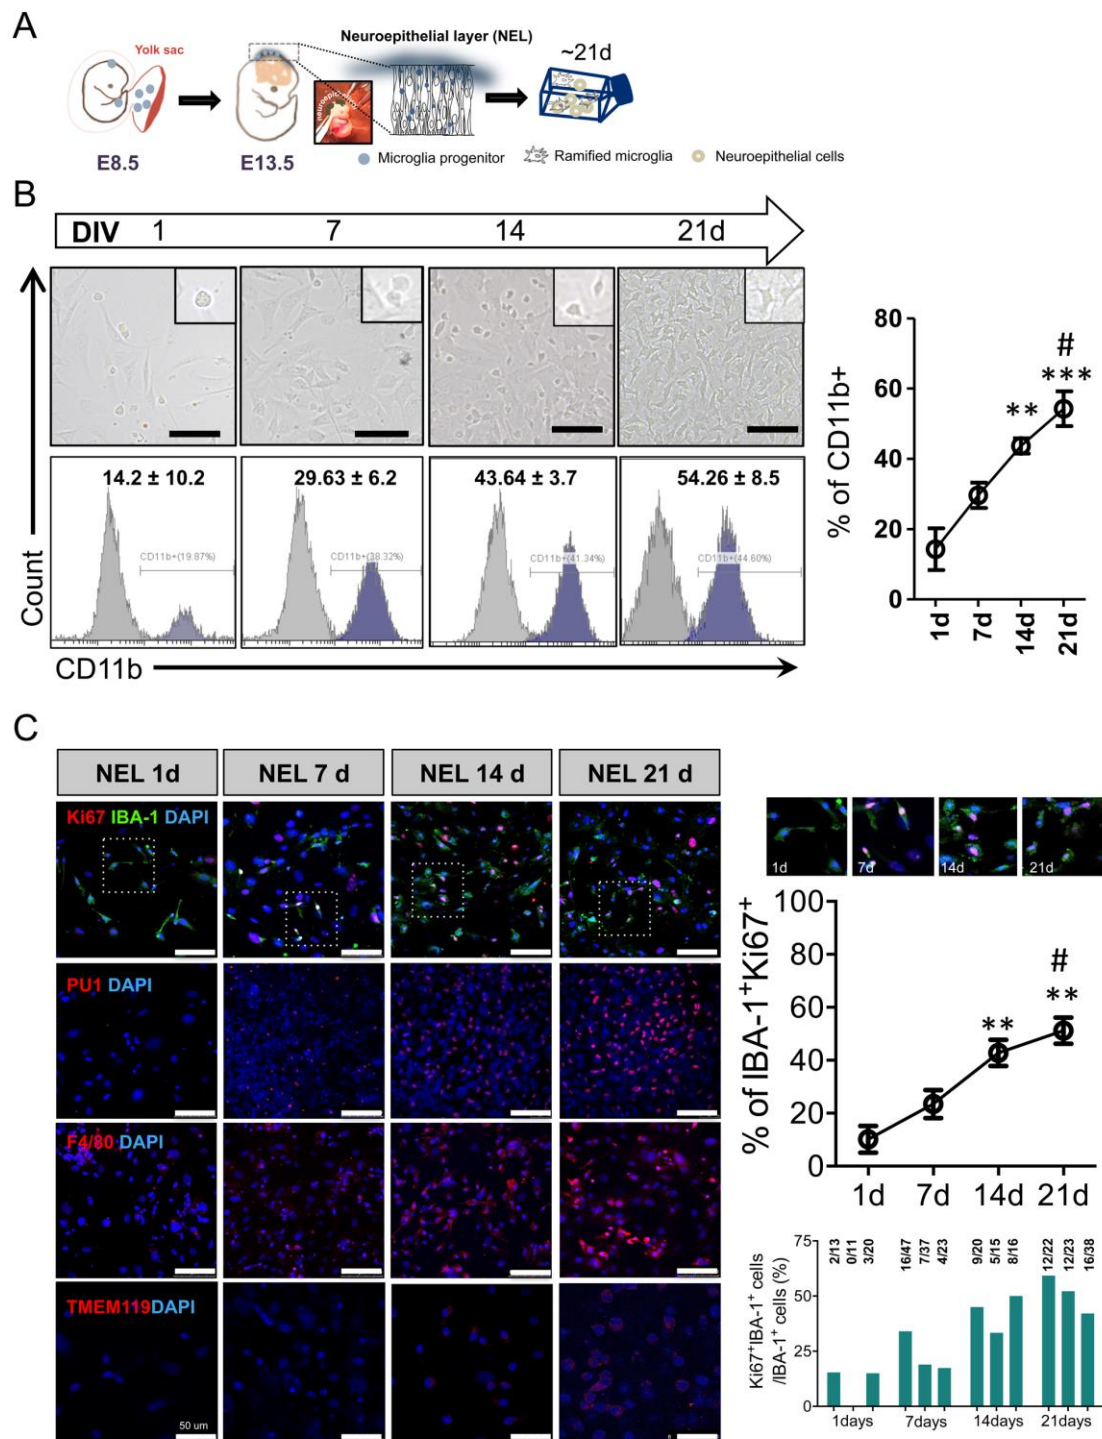

731

732

733 **Figure 1. Expandable microglia generation from the embryo neuroepithelial**

734 **layer**

735 (A) Mouse head neuroepithelial layer (NEL) was dissected at E13.5 and was cultured  
736 for 21 days (d). (B) Microglia progenitors proliferated and ramified over time. (C)  
737 IBA-1<sup>+</sup>Ki67<sup>+</sup> cells were stained and the ratio of IBA-1<sup>+</sup>Ki67<sup>+</sup> cells/IBA-1<sup>+</sup> cells  
738 increased over time. The number of PU1- and F4/80-positive cells also increased with  
739 the progression of the culture. TMEM119 was stained weakly at 21 d. Scale bar = 100  
740  $\mu\text{m}$ . Proliferative microglia (IBA-1<sup>+</sup>Ki67<sup>+</sup> cells) were counted using microscopy.  
741 Sampled areas were selected randomly from 100 $\times$  fields from three independent  
742 experiments. A *post-hoc* test was conducted using Tukey's multiple comparison tests.  
743 \*\*  $p < 0.01$ , \*\*\*  $p < 0.001$  compared to 1 d, #  $p < 0.05$  compared to 7 d.  
744

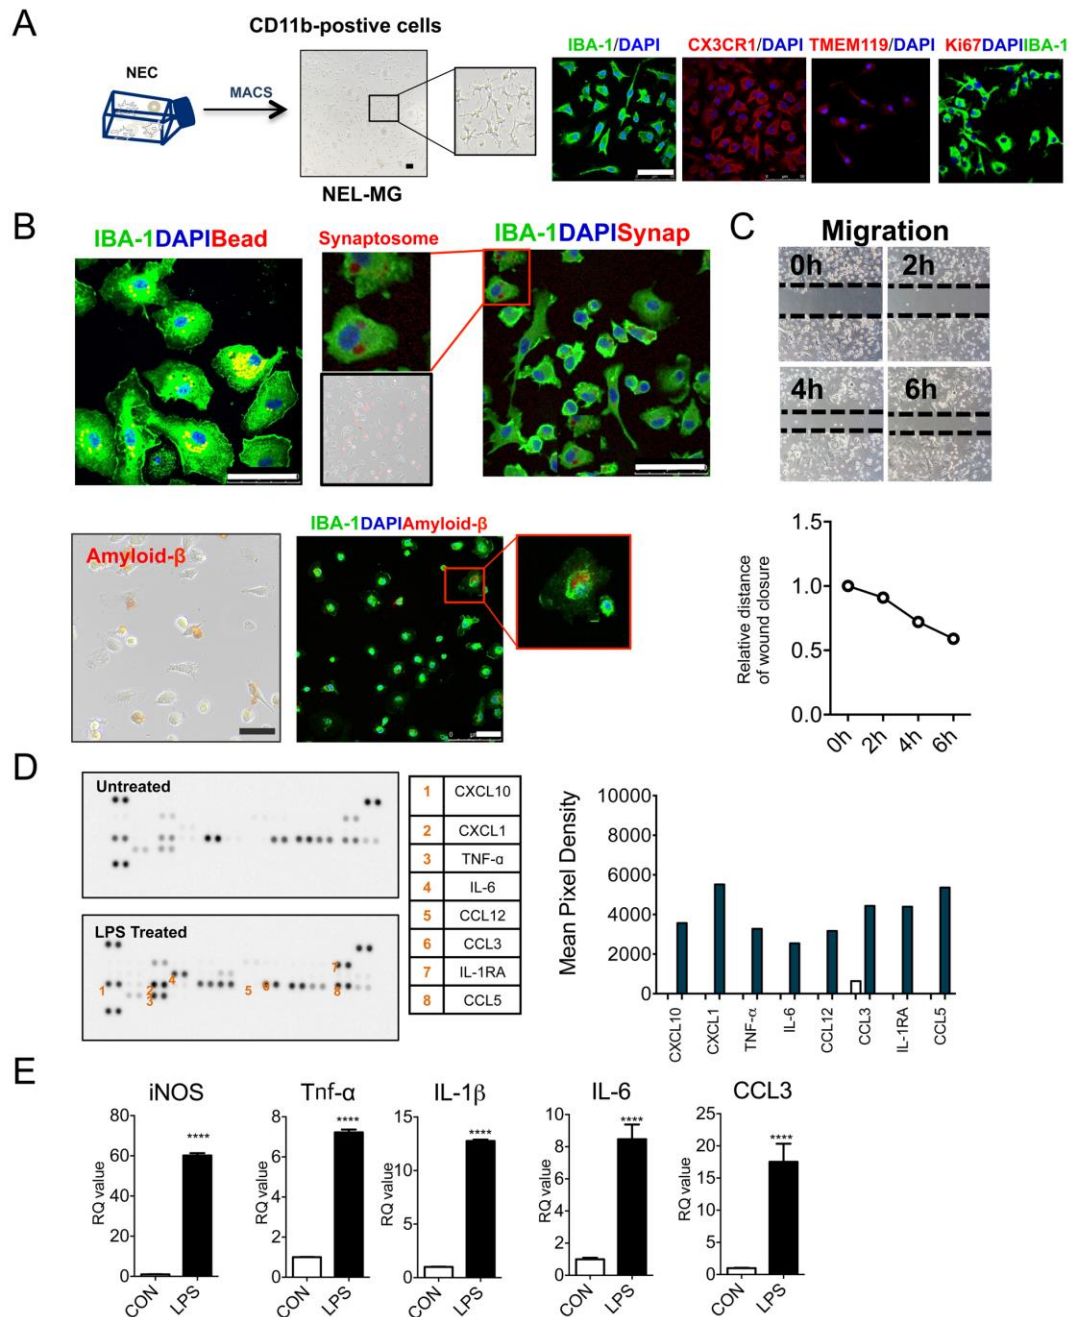

745

746 **Figure 2. Functional validation of NEL-MG**

747 (A) CD11b<sup>+</sup> cells were isolated from cultured NEL for 21 days using a MACS  
 748 system (NEL-MG) and NEL-MG showed IBA-1, CX3CR1, and TMEM119 IR, but  
 749 not Ki67 IR. (B) A phagocytosis assay using microbeads, synaptosome, and amyloid  
 750  $\beta$  was used to assess NEL-MG. (C) Migration performance was assessed using a  
 751 wound healing assay. (D) Cytokines and chemokines released in the supernatant of  
 752 NEL-MG in response to LPS challenge. (E) Transcription in NEL-MG as a baseline  
 753 (CON) and after LPS stimulation (LPS) (n = 3). The experiment was conducted



754 independently three times. Scale bar = 50  $\mu$ m. An unpaired t-test was conducted to  
755 compare the two groups. \*\*\*\*  $p < 0.0001$  compared to the control.

756

757

758

759

760

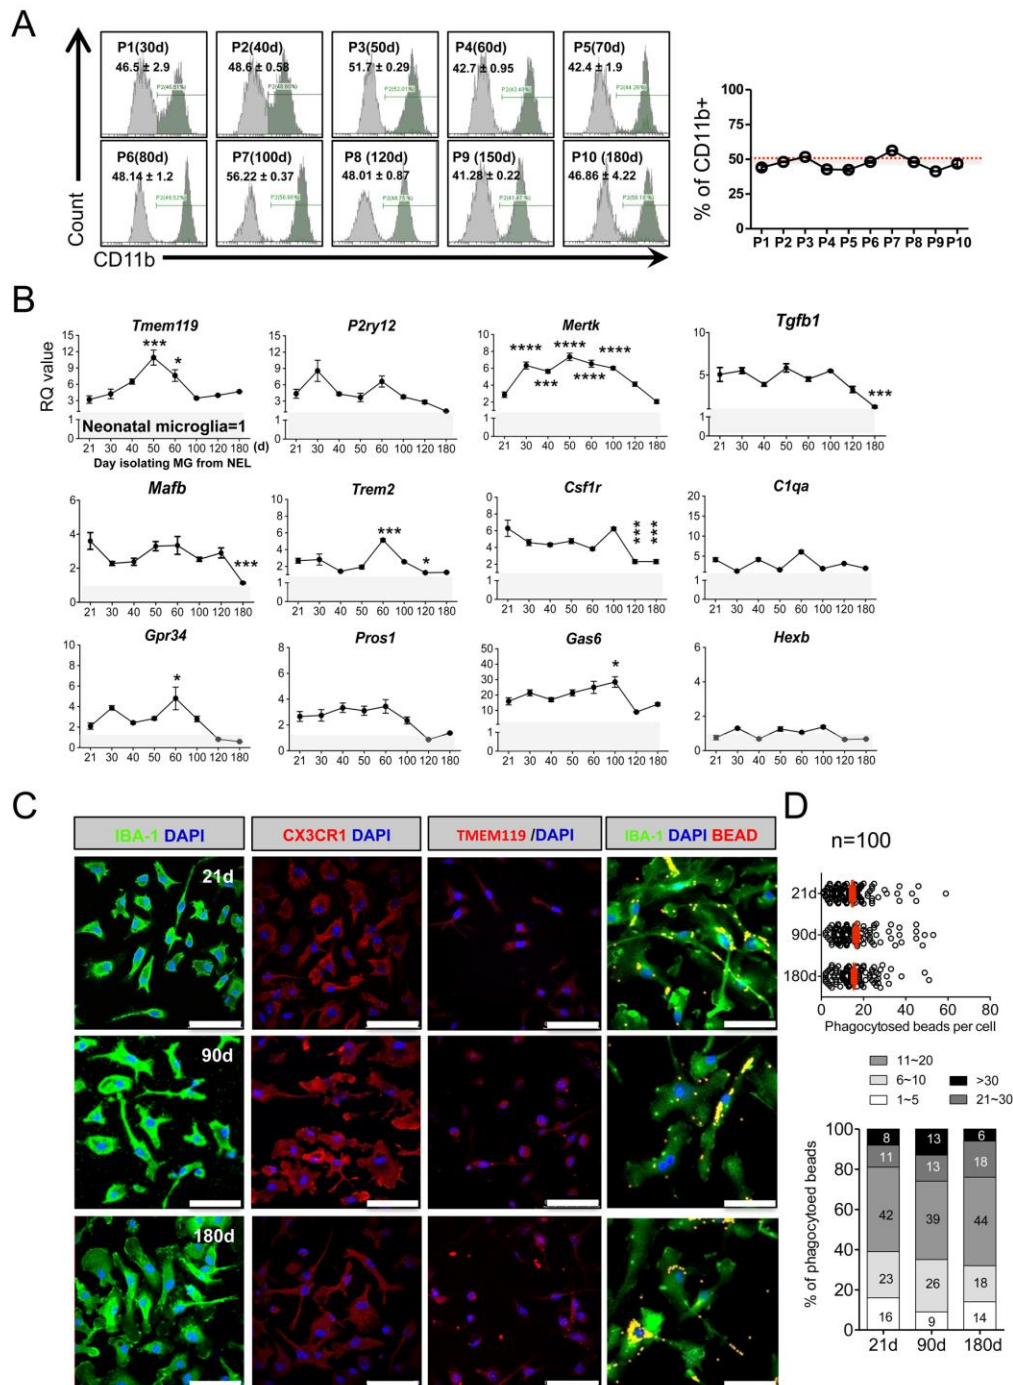

761

762 **Figure 3. Stable maintenance and superiority of NEL-MG on adult microglial**  
763 **genes despite the long-term passage culture**

764 When NEL reached stratification, cells in one 25T Flask were divided into two 25T  
765 flasks, and then cultured for 21 days (d) for flow cytometry. (A) The ratio of CD11b<sup>+</sup>  
766 microglia among NEL was approximately 50%, showing a stable maintenance ratio,  
767 despite the long-term passage culture (n=3, mean ± SD) in flow cytometry. (B) NEL-

768 MG were isolated based on the NEL culture time (21, 30, 40, 50, 60, 100, 120, and  
769 180 d) and alterations in the adult microglial genes were examined compared to  
770 neonatal microglial cells. The experiment was performed three times independently (n  
771 = 3 per group) and the data represents mean  $\pm$  standard error of the mean (SEM). A  
772 *post-hoc* test was conducted using Dunnett's multiple comparison test. \* p < 0.05, \*\*\* p  
773 < 0.0001, \*\*\*\* p < 0.00001 compared to the 21-d group. Gray zone represents a value =  
774 1 (neonatal microglia). (C) IBA-1, CX3CR1, and TMEM119 IRs and phagocytic  
775 function were not different in NEL-MG isolated from NEL at 21, 90, and 180 d. Scale  
776 bar = 50  $\mu$ m.

777

778

779

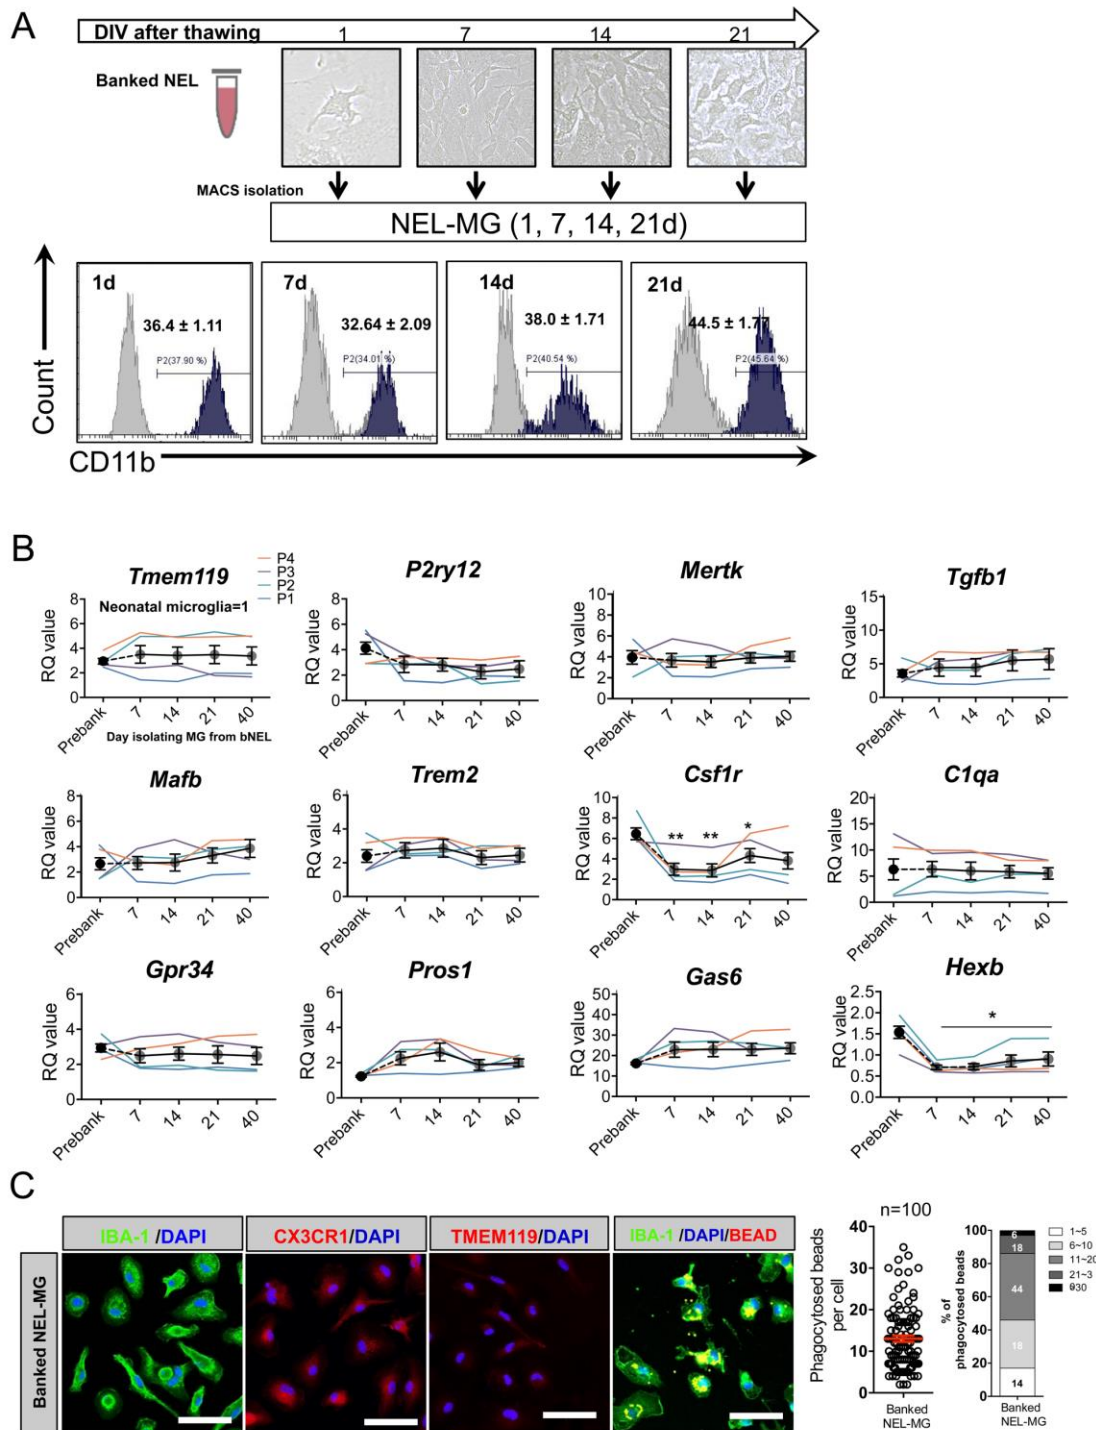

780

781

782 **Figure 4. Validation of NEL-MG isolated from banked NEL**

783 (A) NEL were banked for about 10 months and thawed. The thawed NEL were

784 cultured for 1, 7, 14, 21, 70 days (d) and NEL-MG were isolated at each time point

785 for flow cytometry. (B) Banked NEL at different passages (P1, P2, P3, and P4) were

786 thawed and cultured for 7, 14, 21, 40, and 70 d. NEL-MG were isolated at each time

787 point for qPCR (n = 4 per group) (black circle: mean value of P1, P2, P3, and P4) and  
788 the data represent mean  $\pm$  standard error of the mean (SEM), \* p < 0.05, \*\* p < 0.001  
789 compared to the pre-banked group. A *post-hoc* test was conducted using Dunnett's  
790 multiple comparison tests. (C) Immunofluorescence study of IBA-1, CX3CR1, and  
791 TMEM119 IR and a phagocytosis assay were conducted using banked NEL-MG (70  
792 d). Scale bar = 50  $\mu$ m.

793

794

795

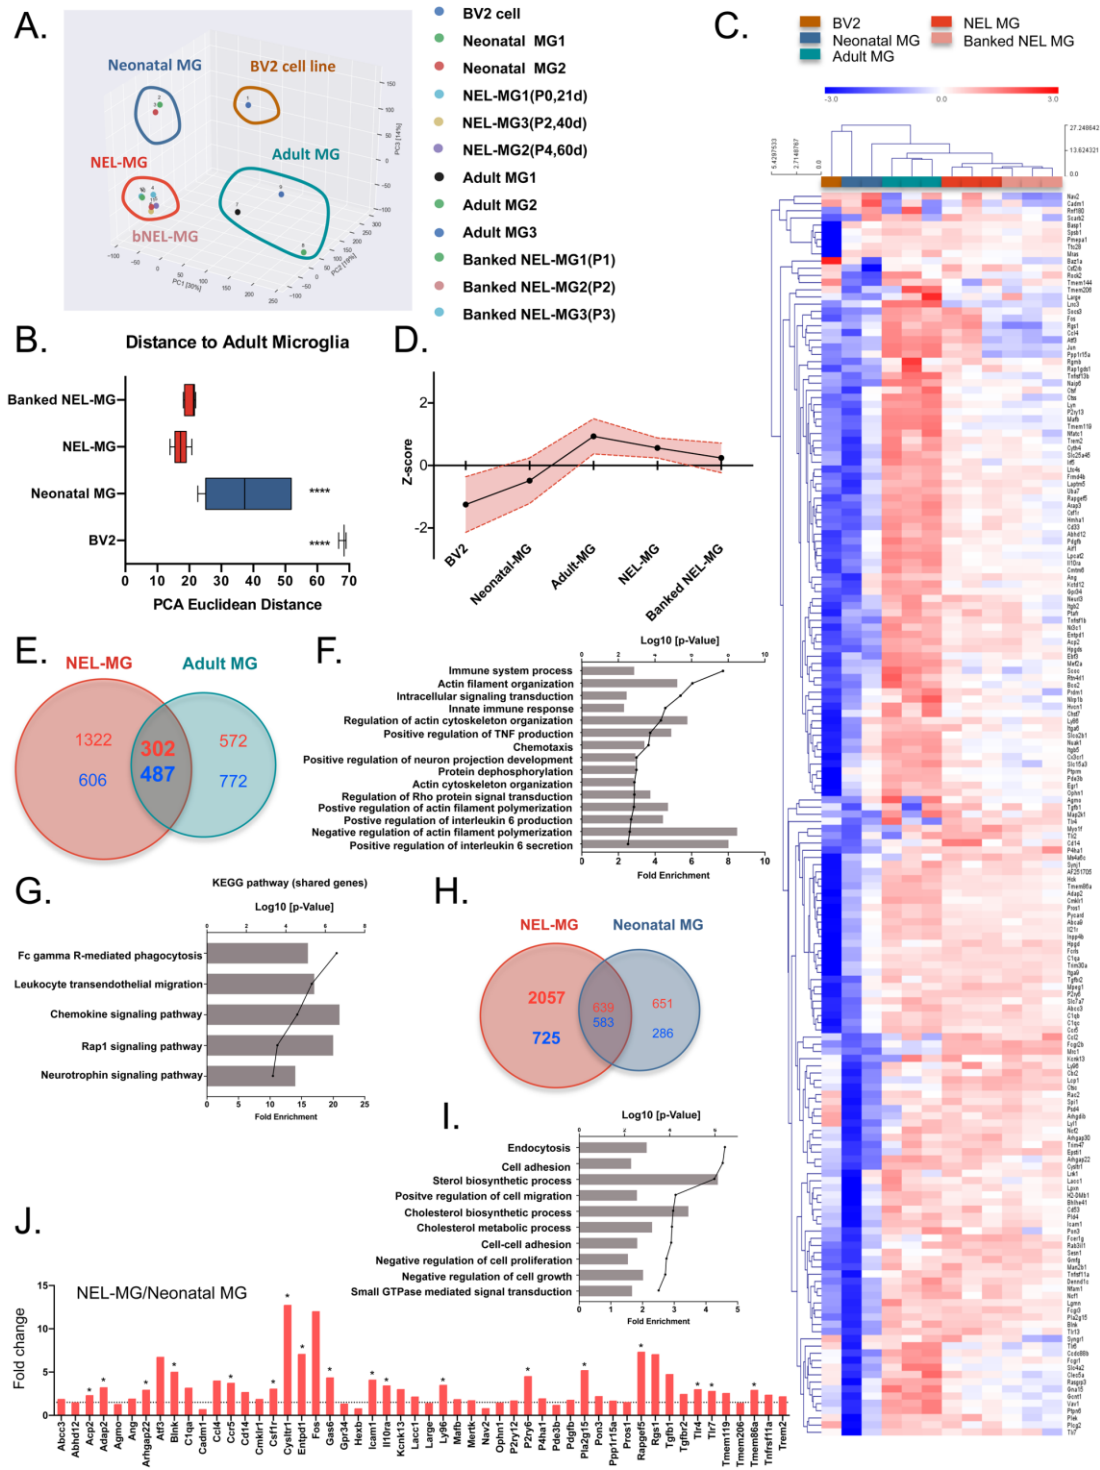

796

797

798 **Figure 5. NEL-MG with a closer fidelity to adult microglia**

799 (A) Principal component analysis (PCA) was performed to determine the similarity  
 800 among the BV2 cell line, neonatal microglia (MG), NEL-MG, banked NEL-MG  
 801 (bNEL-MG), and adult MG. (B) PCA Euclidean distances to the adult MG were  
 802 calculated between all pairs of points in each group using PC1, PC2, and PC3 on

803 microglial signature genes. \*\*\*\*  $p < 0.00001$ . (C) Clustering heatmap representation of  
804 microglia signature gene expression between clusters. The scale represents the median  
805 absolute deviation by row. For calculating the distance, a Euclidean distance metric  
806 and average linkage clustering were performed using MeV software. (D) The overall  
807 expression changes (z-score normalized) were plotted among groups as mean  $\pm$   
808 SD. (E) Differentially expressed genes between NEL-MG and adult MG. The number  
809 of shared genes was 789. (F) Gene ontology (GO) analysis of the shared genes (789  
810 genes). (G) KEGG pathway analysis of the shared genes (789 genes). (H)  
811 Differentially expressed genes between NEL-MG and neonatal MG. The number of  
812 unshared genes in NEL-MG was 2,782 (I). GO analysis of the 2,782 genes. (G)  
813 KEGG pathway analysis of the 2,782 genes. (J) Upregulated differentially expressed  
814 genes between NEL-MG and neonatal MG relative to adult MG were compared  
815 regarding the microglial signature genes. The dotted line indicates 1.5-fold change  
816 compared to neonatal MG. \*  $p < 0.05$ .

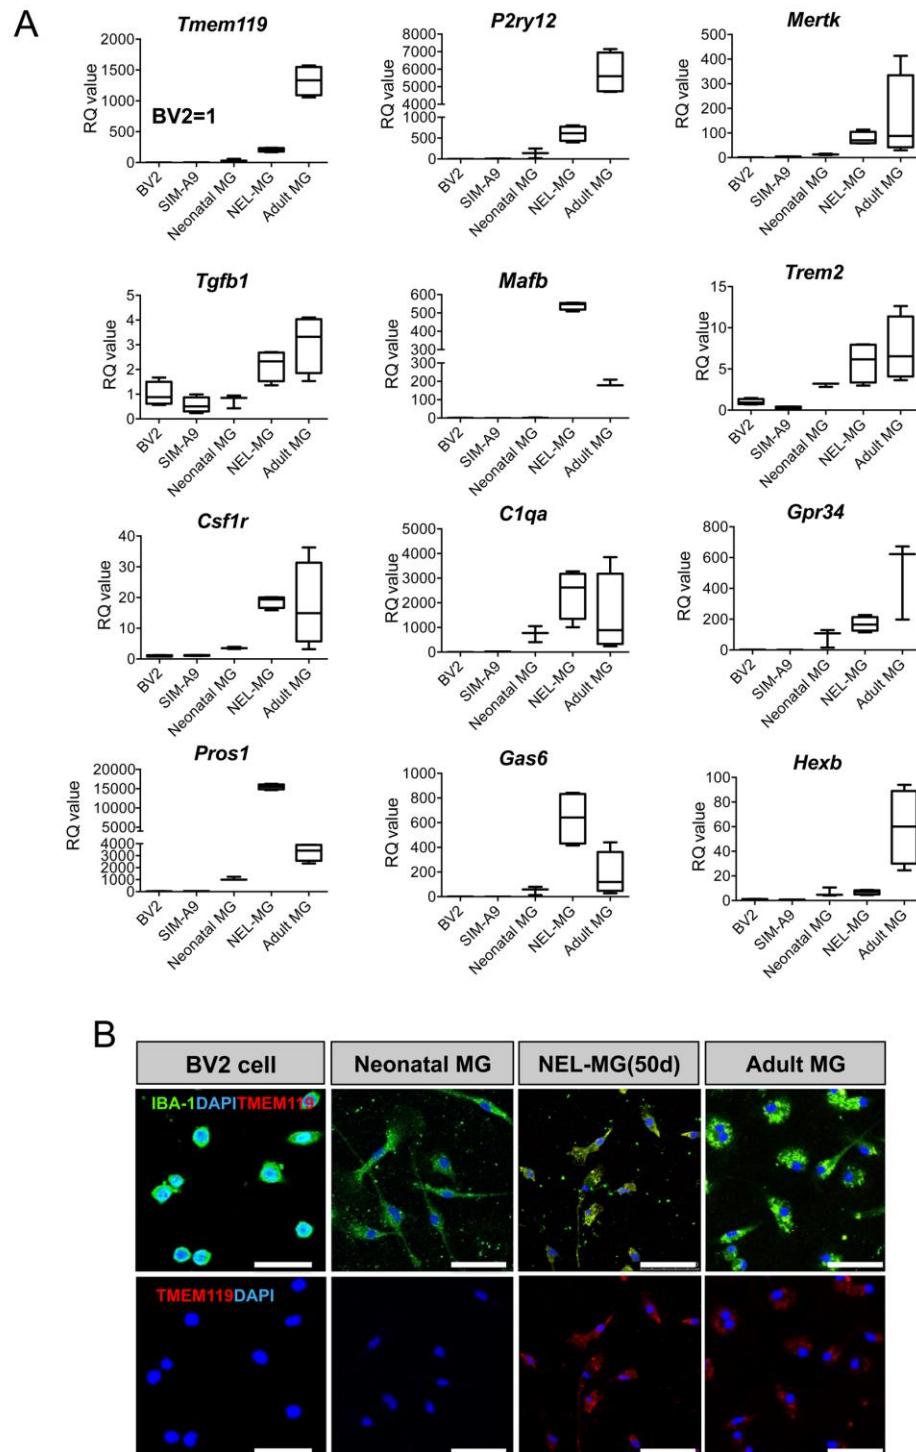

817

818 **Figure 6. Validation of transcriptome analysis**

819 (A) The expression level of adult microglial genes was compared among the BV2 cell  
 820 line, SIM-A9, neonatal microglia (MG), NEL-MG (50 d), and adult MG. n = 3–4 as  
 821 independent experiments.

822 (B) IBA-1 and TMEM119 were stained in NEL-MG and adult MG, but not in  
 823 neonatal MG. Scale bar = 50  $\mu$ m



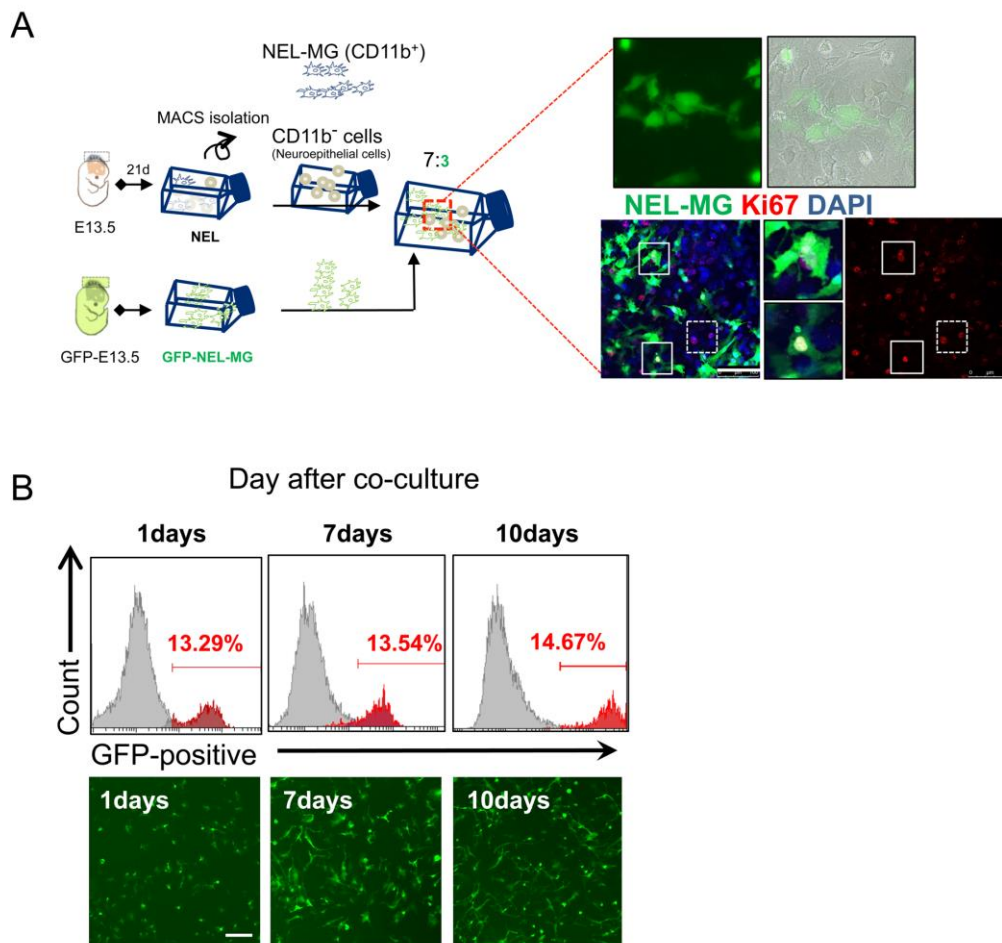

824

825

826 **Figure 7. NEL-MG showed a low re-expansion capacity**

827 (A) GFP-expressing NEL-MG were plated on a neuroepithelial cell feeder and  
828 cultured. GFP-expressing NEL-MG were obtained from B6-EGFP mice using our  
829 methodology. GFP-expressing Ki67-positive NEL-MG (white line square) or no  
830 GFP-expressing Ki67-positive cells (neuroepithelial cells, dot line square) were  
831 examined in the immunofluorescence study. (B) According to the flow cytometry  
832 results, the number of GFP-positive cells was not changed over the culture duration,  
833 but the morphological changes to the ramified form were examined over time. Scale  
834 bar = 100  $\mu$ m.

835

836

837

838

839

840 **Supplementary figures**

841

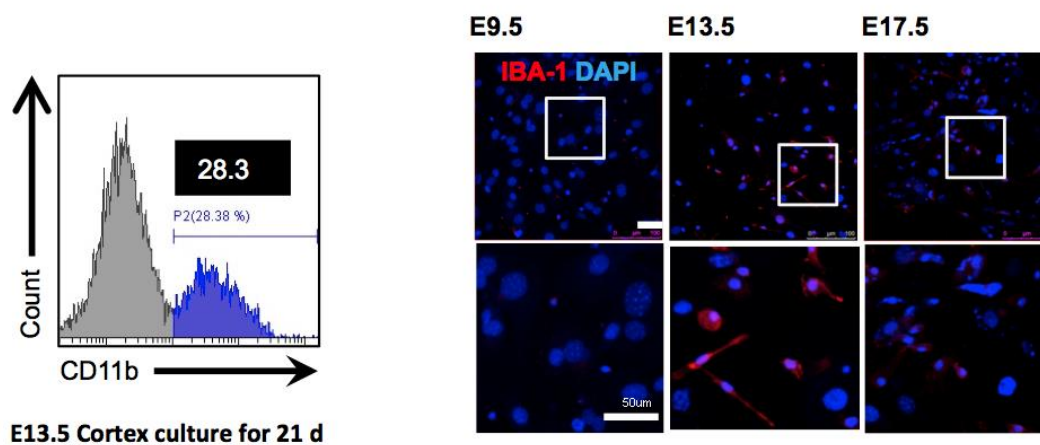

842

843 **Figure S1. Comparison of the cell yields according to the region and embryo**  
844 **stage**

845 Flow cytometry revealed that the dissected head neuroepithelial layer (NEL) from  
846 mouse E13.5 could yield a higher ratio of CD11b-positive cells than the brain cortex  
847 separated from an identical mice group. Immunofluorescence showed that 13.5 NEL  
848 have a higher number of IBA-1-positive cells than neuroepithelial layer from mouse  
849 E9.5 or E17.5, when cultured for 21 days. Scale bar = 50 μm.

850

851

852

853

854

855

856

857

858

859

860

861

862

863

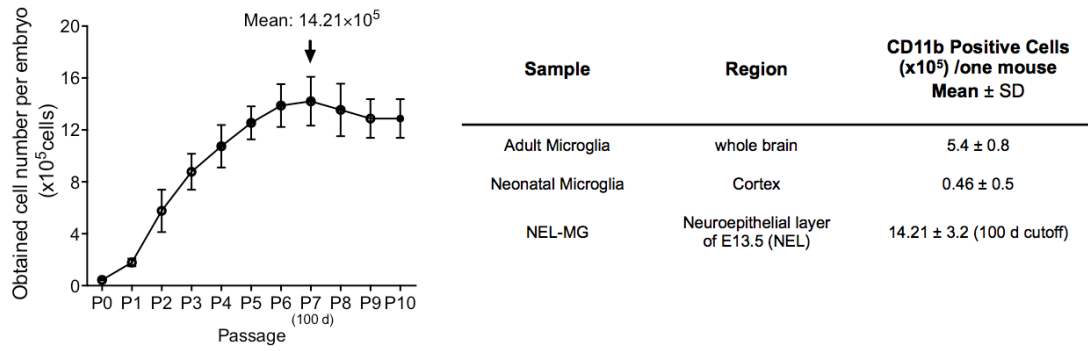

864

865 **Figure S2. Mass production of NEL-MG via subculture**

866 Our method produced thirty times the number of microglial cells than that of neonatal  
867 microglia when we used a cutoff of 100 days. The data are shown as mean ± standard  
868 error of the mean (SEM).

869

870

871

872

873

874

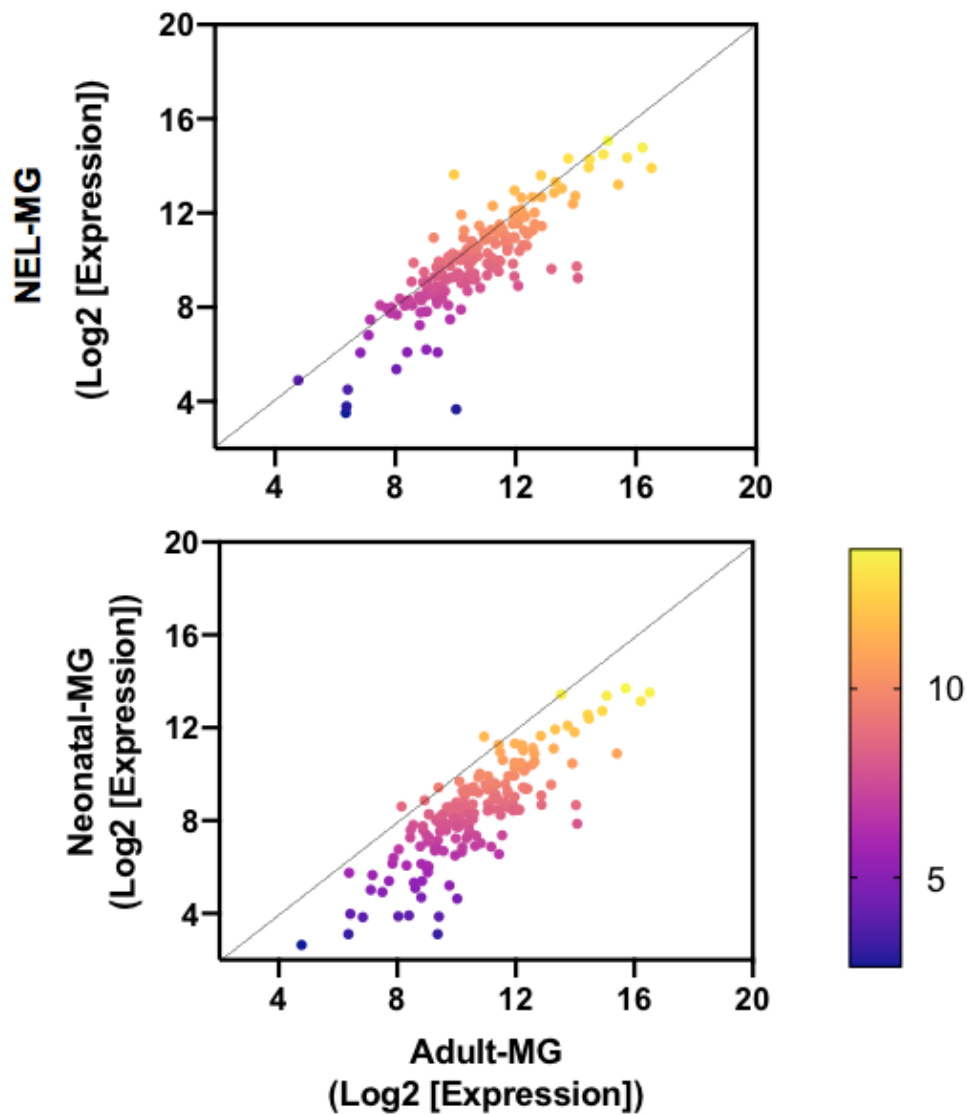

875

876 **Figure S3. Scatter plot comparison between adult microglia and NEL-MG or**  
877 **neonatal microglia (MG)**

878 Diagonal line indicates no significant difference between the two groups (fold change  
879 = 1) and the intensity values are normalized to the log2 transformed expression value.

880

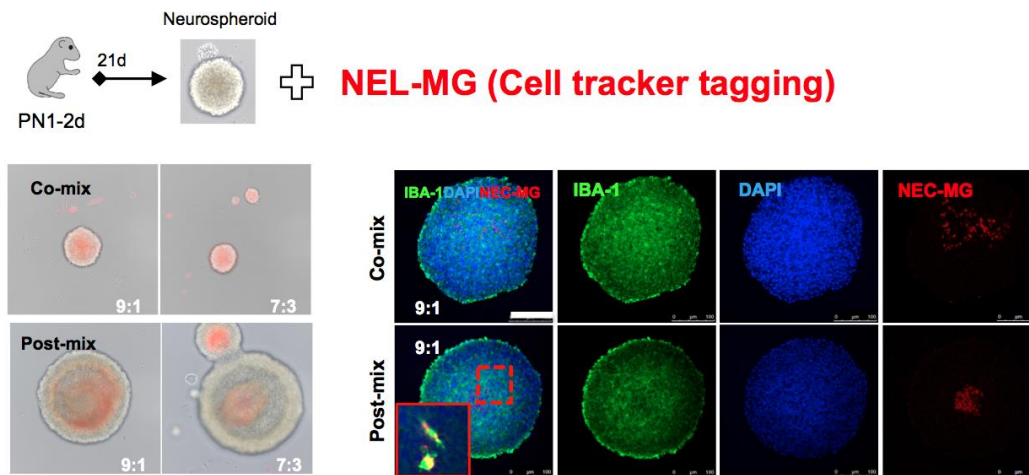

881

882 **Figure S4. Mix with neurospheroid**

883 CellTracker-tagging NEL-MG (red) were mixed with neurospheroids (NS) at  
884 different ratios and times. NEL-MG were mixed evenly with NS when we co-mixed  
885 them. IBA-1 can label both resident microglia and mixed NEL-MG.

886

887

888

889

890

891

892

893

894

895

896

897

898

899

900

901

902

903

904

905

906 **Table S1. List of microglial signature genes**

|                 |                 |                  |                 |                  |                 |
|-----------------|-----------------|------------------|-----------------|------------------|-----------------|
| <i>Ly96</i>     | <i>C1qa</i>     | <i>Cmklr1</i>    | <i>Fcer1g</i>   | <i>Hpgds</i>     | <i>Acp2</i>     |
| <i>Abca9</i>    | <i>Sesn1</i>    | <i>Cmtm6</i>     | <i>Fcgr2b</i>   | <i>Fcgr1</i>     | <i>Ly86</i>     |
| <i>Abcc3</i>    | <i>C1qb</i>     | <i>Rock2</i>     | <i>Pdgfb</i>    | <i>Cd14</i>      | <i>Lyl1</i>     |
| <i>Adap2</i>    | <i>P4ha1</i>    | <i>Agmo</i>      | <i>Ctsf</i>     | <i>Hvcn1</i>     | <i>Lyn</i>      |
| <i>Rgs1</i>     | <i>C1qc</i>     | <i>Csflr</i>     | <i>Fcgr3</i>    | <i>Nr3c1</i>     | <i>Abhd12</i>   |
| <i>AF251705</i> | <i>Lrrc3</i>    | <i>Fos</i>       | <i>Fcrls</i>    | <i>Icam1</i>     | <i>Lgmn</i>     |
| <i>Aif1</i>     | <i>Cbr2</i>     | <i>Kcnk13</i>    | <i>Cx3cr1</i>   | <i>Il21r</i>     | <i>Mafb</i>     |
| <i>Arap3</i>    | <i>Nuak1</i>    | <i>Csf2rb</i>    | <i>Itgb5</i>    | <i>Irf5</i>      | <i>Tmem144</i>  |
| <i>Arhgap30</i> | <i>Ccdc88b</i>  | <i>Ctsc</i>      | <i>Synj1</i>    | <i>Itga9</i>     | <i>Man2b1</i>   |
| <i>Arhgdib</i>  | <i>Ccr5</i>     | <i>Rapgef5</i>   | <i>Gcnt1</i>    | <i>Itgb2</i>     | <i>Ctss</i>     |
| <i>Atf3</i>     | <i>Basp1</i>    | <i>Cysltr1</i>   | <i>Rgmb</i>     | <i>Laptm5</i>    | <i>Mpeg1</i>    |
| <i>Tmem206</i>  | <i>Bhlhe41</i>  | <i>Cyth4</i>     | <i>Gmfg</i>     | <i>Lcp1</i>      | <i>Mrc1</i>     |
| <i>Baz1a</i>    | <i>Cd33</i>     | <i>Dennd1c</i>   | <i>Gna15</i>    | <i>Lpcat2</i>    | <i>Ms4a6c</i>   |
| <i>Rtn4rl1</i>  | <i>Rnf180</i>   | <i>Gpr34</i>     | <i>Il10ra</i>   | <i>Myo1f</i>     | <i>Pld4</i>     |
| <i>Ccl2</i>     | <i>Arhgap22</i> | <i>H2-DMb1</i>   | <i>Blnk</i>     | <i>Naip6</i>     | <i>Plek</i>     |
| <i>Cd53</i>     | <i>Ang</i>      | <i>Egr1</i>      | <i>Jun</i>      | <i>Ncf1</i>      | <i>Prdm1</i>    |
| <i>Ccl4</i>     | <i>Entpd1</i>   | <i>Hck</i>       | <i>Lpxn</i>     | <i>Rap1gds1</i>  | <i>Pon3</i>     |
| <i>Clec5a</i>   | <i>Epsti1</i>   | <i>Hmha1</i>     | <i>Lrrk1</i>    | <i>Ncf2</i>      | <i>Psd4</i>     |
| <i>Trim47</i>   | <i>Lacc1</i>    | <i>Hpgd</i>      | <i>Itga6</i>    | <i>Neurl3</i>    | <i>Ptafr</i>    |
| <i>Socs3</i>    | <i>Kctd12</i>   | <i>Rasgrp3</i>   | <i>Ltc4s</i>    | <i>P2ry6</i>     | <i>Scoc</i>     |
| <i>Frmd4b</i>   | <i>Syng1</i>    | <i>Tlr7</i>      | <i>Nav2</i>     | <i>Map2k1</i>    | <i>Ppp1r15a</i> |
| <i>Ptpn6</i>    | <i>Tlr2</i>     | <i>Trim30a</i>   | <i>Mef2a</i>    | <i>Mras</i>      | <i>Tmem86a</i>  |
| <i>Pycard</i>   | <i>Pla2g15</i>  | <i>Tnfrsf11a</i> | <i>Slc15a3</i>  | <i>Tnfrsf13b</i> | <i>Cadm1</i>    |
| <i>Rab3il1</i>  | <i>Tlr4</i>     | <i>Chst7</i>     | <i>Slc25a45</i> | <i>Tnfrsf1b</i>  | <i>Bco2</i>     |
| <i>Rac2</i>     | <i>Tmem119</i>  | <i>Ophn1</i>     | <i>Slc7a7</i>   | <i>Tgfbr2</i>    | <i>Pde3b</i>    |
| <i>Nfam1</i>    | <i>P2ry13</i>   | <i>Scarb2</i>    | <i>Ebf3</i>     | <i>Uba7</i>      | <i>Pros1</i>    |
| <i>Nfatc1</i>   | <i>Spsb1</i>    | <i>Ttc28</i>     | <i>Large</i>    | <i>Vav1</i>      | <i>Tlr6</i>     |
| <i>Nlrp1b</i>   | <i>Ptpm</i>     | <i>Plcg2</i>     | <i>Inpp4b</i>   | <i>Trem2</i>     | <i>Tlr13</i>    |
| <i>Pmepal</i>   | <i>Slc4a2</i>   | <i>Slco2b1</i>   | <i>Tgfb1</i>    | <i>Spi1</i>      |                 |

907

908

909

910

911

912

913

914

915 **Table S2. Primers information.**

| <i>Primer</i> | sequence                                                                  |
|---------------|---------------------------------------------------------------------------|
| <i>Trem2</i>  | <i>F: TGGGACCTCTCCACCAGTT</i><br><i>R: GTGGTGTGAGGGCTTGG</i>              |
| <i>iNOS</i>   | <i>F: CATTGGAAGTGAAGCGTTTCG</i><br><i>R: CAGCTGGGCTGTACAAACCTT</i>        |
| <i>Tnf-a</i>  | <i>F: GAGTCCGGGCAGGTCTACTTT</i><br><i>R: CAGGTCACTGTCCCAGCATCT</i>        |
| <i>IL-1b</i>  | <i>F: GGCTGGACTGTTTCTAATGC</i><br><i>R: ATGGTTTCTTGTGACCCTGA</i>          |
| <i>IL-6</i>   | <i>F: CCACTTCACAAGTCGGAGGCTTA</i><br><i>R: GCAAGTGCATCATCGTTGTTTCATAC</i> |
| <i>CCL3</i>   | <i>F: CCAAGTCTTCTCAGCGCCAT</i><br><i>R: TCCGGCTGTAGGAGAAGCAG</i>          |

916
